# Supplementary material for: Citrullination of H3 and Neutrophil Extracellular Traps are reduced upon activation in Proliferative Diabetic Retinopathy patients
Source: Research Square preprint supplement (doi:10.21203/rs.3.rs-7935515/v1), 2025-11-20
Supplement: Supplementary file 1 [file 6f6392926e073d71183ef5a6.docx]

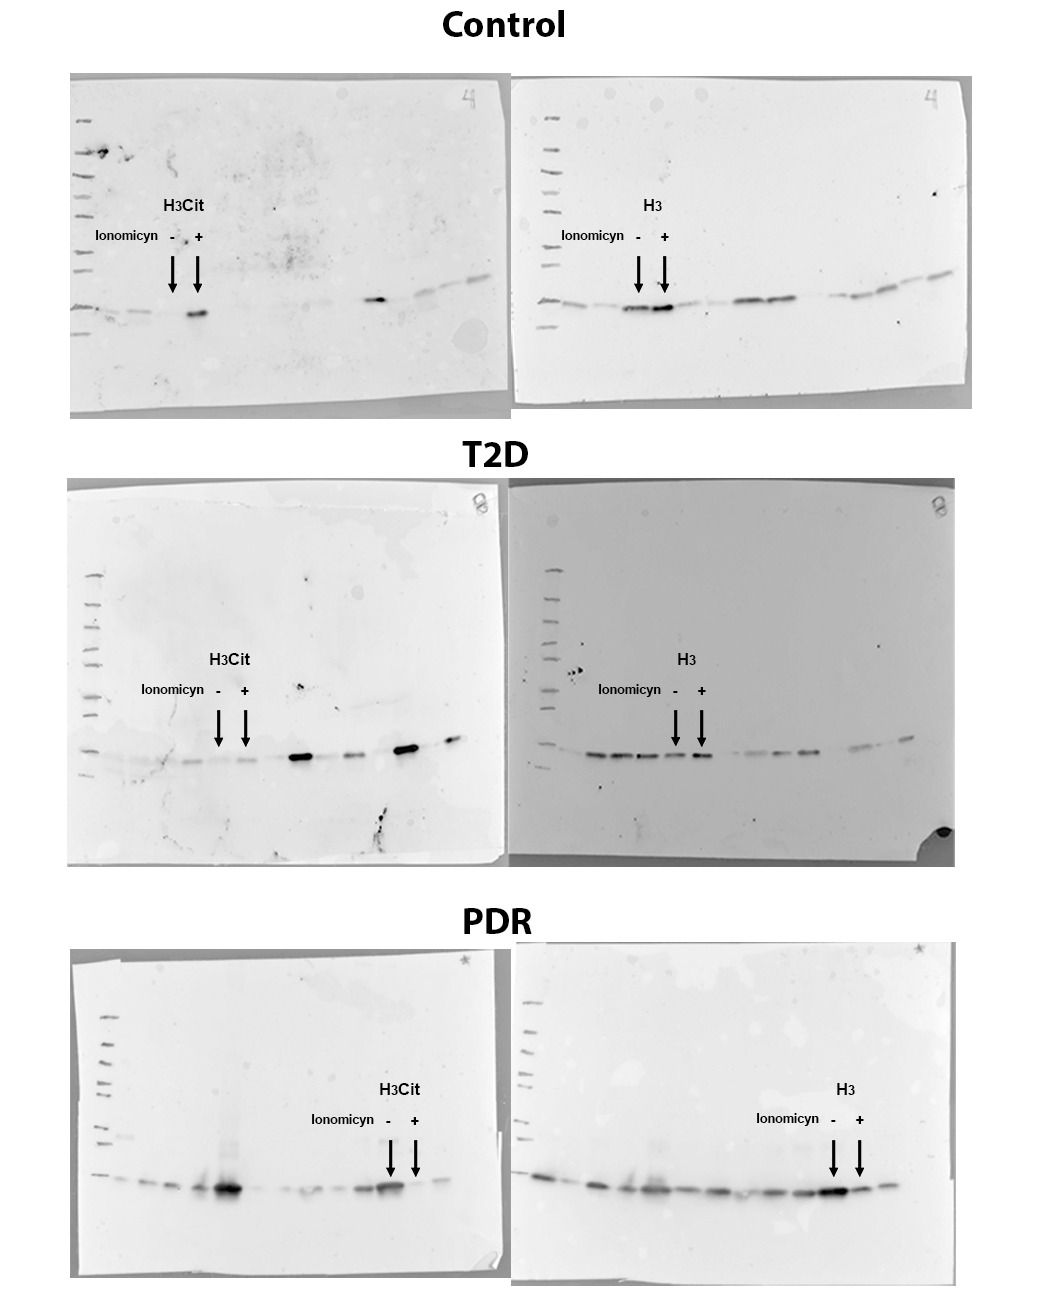


Supplementary Figure 1.

Representative uncropped Blots images showing the expression of citrullinated histone H3 (H3Cit) and total histone H3 (H3) in peripheral neutrophils under non-stimulated (NS) and stimulated (S, ionomycin-treated) conditions from control subjects, individuals with T2D (T2D, without diabetic retinopathy), and patients with proliferative diabetic retinopathy (PDR).
